# Supplementary material for: β-NaGdF4 nanotubes: one-pot synthesis and luminescence properties
Source: Royal Society of Chemistry journal article supplement (doi:10.1039/c4dt03619k), 2015-01-01
Supplement: c4dt03619k1.pdf [file c4dt03619k1.pdf]

## **Electronic Supplementary Information (ESI)**

### **$\beta$ -NaGdF<sub>4</sub> Nanotubes: One-Pot Synthesis, Growth Mechanism, and Luminescence Properties**

Qi Zhao,<sup>ab</sup> Baiqi Shao,<sup>ab</sup> Wei Lü,<sup>a</sup> Wenzhen Lv,<sup>ab</sup> Mengmeng Jiao,<sup>ab</sup> Lingfei Zhao,<sup>ab</sup> and Hongpeng You<sup>\*a</sup>

<sup>a</sup>State Key Laboratory of Rare Earth Resource Utilization, Changchun Institute of Applied Chemistry, Chinese Academy of Sciences, Changchun 130022, P. R. China.

<sup>b</sup>University of the Chinese Academy of Sciences, Beijing 100049, P. R. China.

\*Corresponding author: E-mail: hpyou@ciac.ac.cn

**Table S1** The dopant concentration measured by EDS.

| Sample               | NaGdF <sub>4</sub> :2 mol% Ce <sup>3+</sup> , 2 mol% Eu <sup>3+</sup> | NaGdF <sub>4</sub> :2 mol% Ce <sup>3+</sup> , 2 mol% Tb <sup>3+</sup> | NaGdF <sub>4</sub> :2 mol% Ce <sup>3+</sup> , 2 mol% Dy <sup>3+</sup> |
|----------------------|-----------------------------------------------------------------------|-----------------------------------------------------------------------|-----------------------------------------------------------------------|
| Concentration (mol%) | Ce: 2.11<br>Eu: 1.89                                                  | Ce: 2.18<br>Tb:2.19                                                   | Ce:2.05<br>Dy:1.90                                                    |

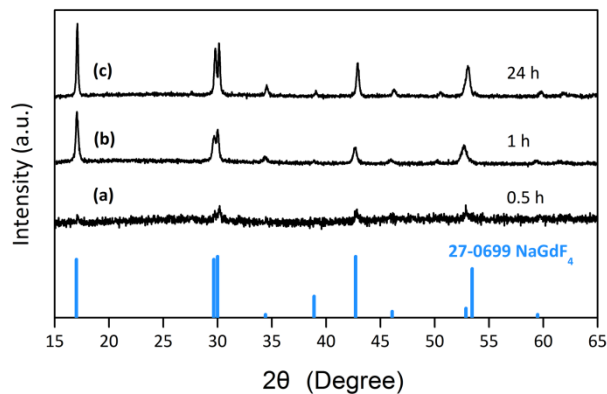

**Fig. S1** XRD patterns of samples obtained after different reaction time: (a) 0.5 h, (b) 1 h, (c) 24 h.

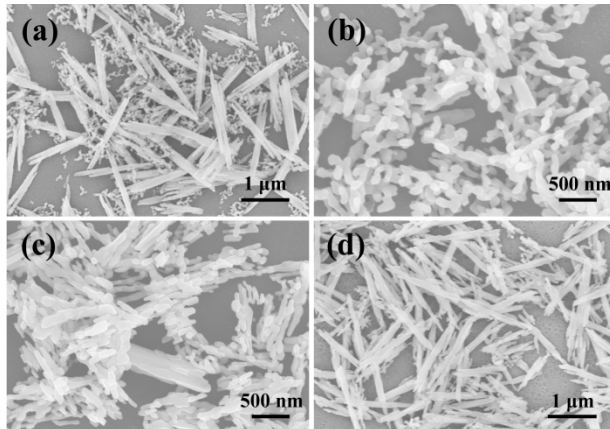

**Fig. S2** SEM images of samples prepared with (a) sodium hydroxide, (b) butylamine, (c) propylamine, and (d) aqueous ammonia as alkaline source.

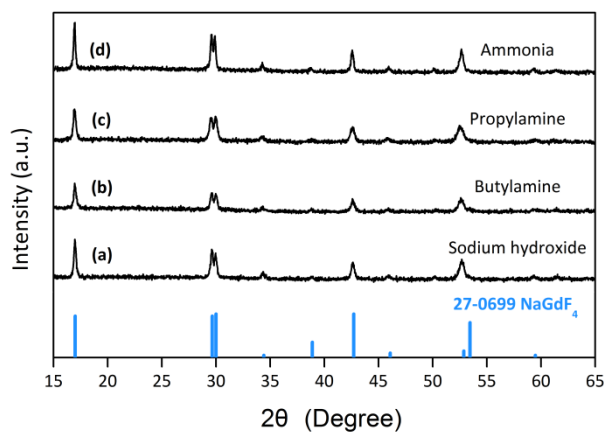

**Fig. S3** XRD patterns of samples prepared with (a) sodium hydroxide, (b) butylamine, (c) propylamine, and (d) aqueous ammonia as alkaline source.

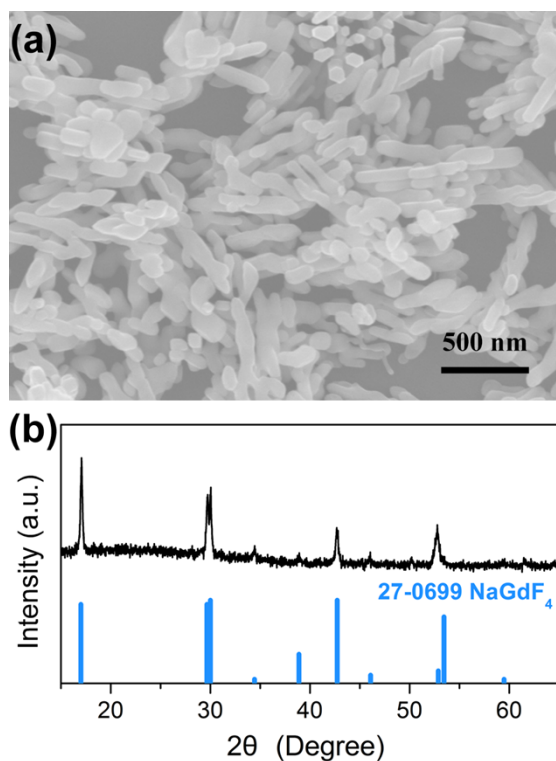

**Fig. S4** XRD pattern and SEM image of sample using NaF as fluorine source.

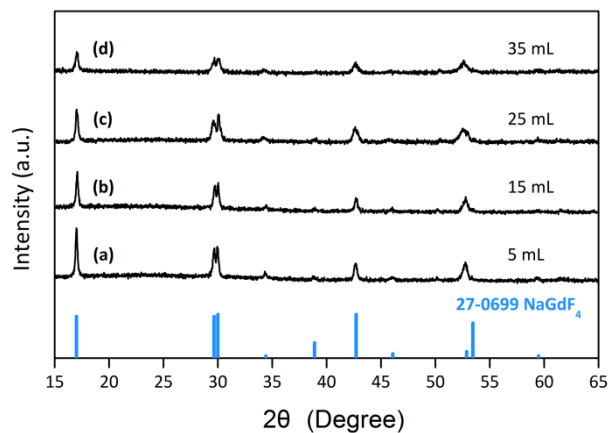

**Fig. S5** XRD patterns of samples synthesized with different EG amount: (a) 5 mL, (b) 15 mL, (c) 25 mL, (d) 35 mL.

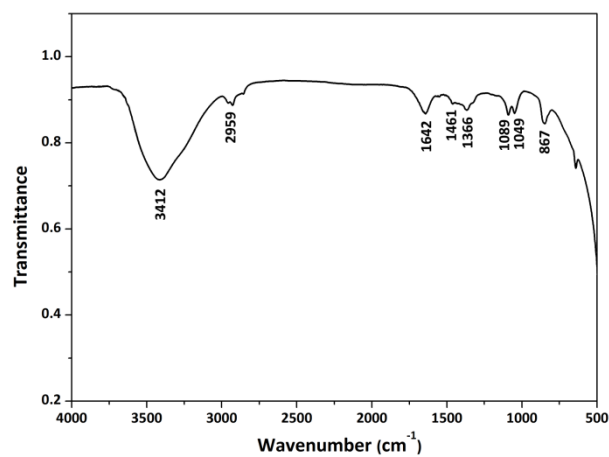

**Fig. S6** FT-IR spectra for the typical NaGdF<sub>4</sub> sample.

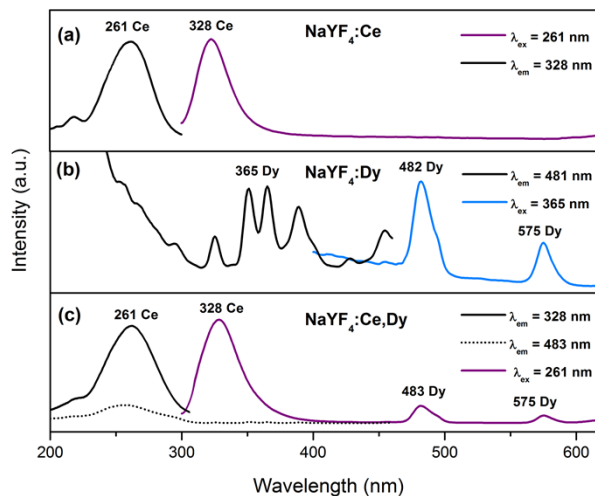

**Fig. S8** Excitation (left) and emission (right) spectra of the (a)  $\text{NaYF}_4:\text{Ce}$ , (b)  $\text{NaYF}_4:\text{Dy}$ , and (c)  $\text{NaYF}_4:\text{Ce,Dy}$  samples.

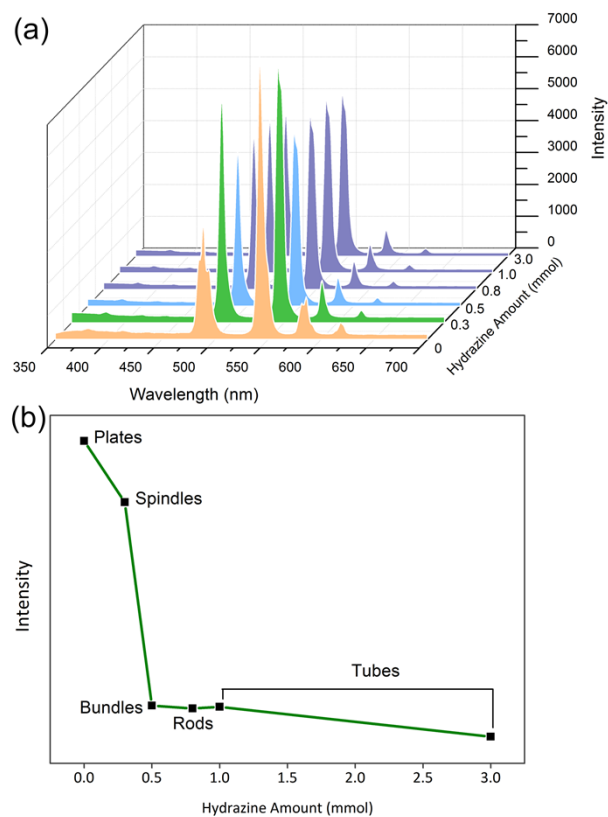

**Fig. S9** (a) Emission spectra of the (a)  $\text{NaYF}_4:\text{Ce,Tb}$  samples prepared with different hydrazine addition. (b) The dependence of the luminescence intensity of the samples on the hydrazine amount.
